# Supplementary material for: Predicting thermodynamic stability of inorganic compounds using ensemble machine learning based on electron configuration
Source: PubMed Central journal article supplement — Nat Commun. 2025 Jan 2;16:203. doi: 10.1038/s41467-024-55525-y (PMC11696921; doi:10.1038/s41467-024-55525-y), 2025-01-02
Supplement: 41467_2024_55525_MOESM1_ESM.pdf [file 41467_2024_55525_MOESM1_ESM.pdf]

**Supplementary Information for**

**Predicting Thermodynamic Stability of Inorganic  
Compounds Using Ensemble Machine Learning Based on  
Electron Configuration**

*Zou et al.*

## Supplementary Notes

### Supplementary Note 1

#### The definitions of decomposition enthalpy and energy above the hull

In this study, the decomposition energy ( $\Delta H_d$ ) is defined as the total energy difference between a given compound and competing compounds in a specific chemical space. It represents the magnitude of (in)stability with respect to phase separation<sup>1</sup>.

$\Delta H_d$  differs from the commonly used “energy above the hull”. To obtain the  $\Delta H_d$  of a compound, the compound needed to be excluded when constructing the energy hull of the system in which it resides.  $\Delta H_d$  refers to the distance from the energy of the compound to the hull. As demonstrated in Supplementary Fig. 1,  $\Delta H_d$  of  $A_4B$  is calculated as the distance from the convex hull to  $A_4B$ . If a compound is above the energy hull, the value of  $\Delta H_d$  is larger than zero, corresponding to the commonly reported "energy above the hull". However, if the compound, such as  $AB_3$ , is on the energy convex hull, the  $\Delta H_d$  of  $AB_3$  represents the distance between  $AB_3$  and a hypothetical convex hull constructed without  $AB_3$  (indicated by the dashed line). In this case, the value of  $\Delta H_d$  is negative, which quantifies the stability of the material and provides useful information for the uncertainty of stability assessment and the rationality of synthesis<sup>1,2</sup>.

## Supplementary Note 2

### Discussion about the complementarity of different base-level models.

To ensure complementarity we have selected domain knowledge from different scales: interatomic interactions, atomic properties, and EC. Models based on these kinds of domain knowledge each have their own advantages. More specifically, the input of Magpie is the statistics of various element properties, Roost considers the interaction between atoms through the attention mechanism, and ECCNN goes a step further to the level of the electron configuration of atoms. We validated this through error correlation analysis and entropy distribution of each model. The error correlation matrix is a common tool to measure the correlation between the prediction errors of multiple models on the same data set. The smaller the correlation, the stronger the complementarity. The entropy distribution is also used to analyze the difference in uncertainty of the models in prediction. If one model has high uncertainty on some samples and the other model does not, it indicates that they are complementary, as shown in Supplementary Fig. 3.

From Supplementary Fig. 3(a), the three models do not have a strong correlation in error correlation with Pearson coefficient ranging from 0.37 to 0.49. From the sample entropy distribution of the models in Supplementary Fig. 3(b), there are obvious differences in the entropy distribution of each model. Roost is more distributed in the low entropy area, Magpie is more distributed in the high entropy area, and ECCNN is more evenly distributed. In summary, it can be concluded that the three models are complementary.

### Supplementary Note 3

#### Discussion about integrating extra models and heterogeneous data.

The proposed combination method, Stacked Generalization (SG), is highly flexible because it allows the inclusion of various types of base models. This flexibility enables the seamless integration of new models designed to handle different data types, such as numerical data, spectral data, and image data.

When new base models are introduced, the meta-level model dynamically adjusts the weights for all base models during training. For example, the original ECSG model combines predictions from three base models (ECCNN, Roost, and Magpie), with the meta-level model calculating the weighted prediction:  $\hat{y} = \omega_1 \hat{y}_1 + \omega_2 \hat{y}_2 + \omega_3 \hat{y}_3 + \varepsilon$ , where  $\hat{y}_1, \hat{y}_2, \hat{y}_3$  are predictions from the initial models,  $\omega_1, \omega_2, \omega_3$  are their corresponding weights, and  $\varepsilon$  is the interception. To incorporate additional data types, such as spectral data, we can introduce a new base model, K\_dos\_fea<sup>3</sup>, which extracts features from spectra using one-dimensional convolution. This model generates a new prediction  $\hat{y}_4$ . Upon adding the spectral model, the meta-level model updates the weighted combination as follows:  $\hat{y} = \omega'_1 \hat{y}_1 + \omega'_2 \hat{y}_2 + \omega'_3 \hat{y}_3 + \omega'_4 \hat{y}_4 + \varepsilon'$ . Similarly, new base models using CNNs can be introduced to handle image data, with the meta-model dynamically adjusting the weights for all sub-models. This modular approach ensures that ECSG can efficiently integrate diverse data sources, assigning appropriate weights to each type for accurate predictions.

Each base-level model processes only its respective data type, and the training of these models remains independent. Since the inputs are not fused or converted, data integrity is maintained throughout the process, avoiding potential information loss.

## Supplementary Figures

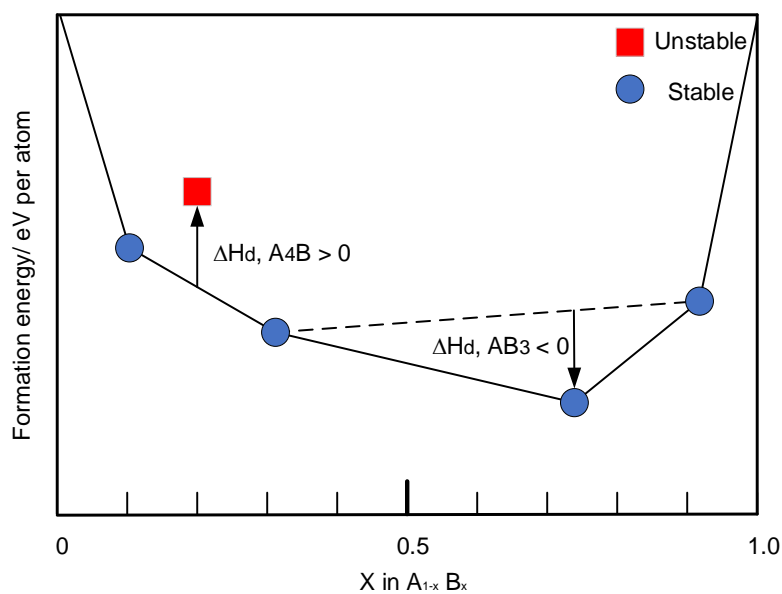

**Supplementary Fig. 1** Illustration of the definition of  $\Delta H_d$  by constructing a convex hull.

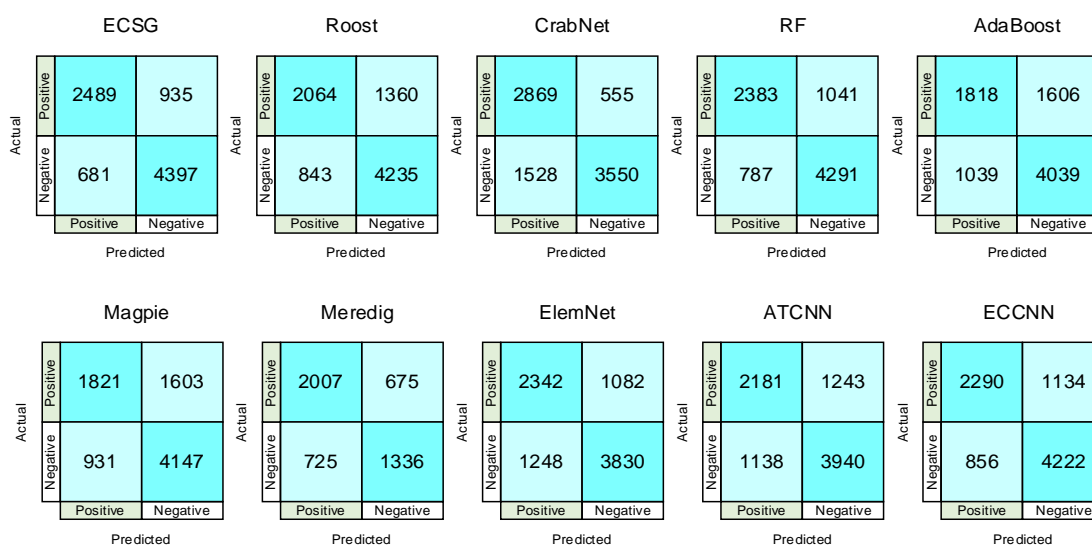

**Supplementary Fig. 2** Confusion matrices of ECSG and other composition-based models trained on MP.

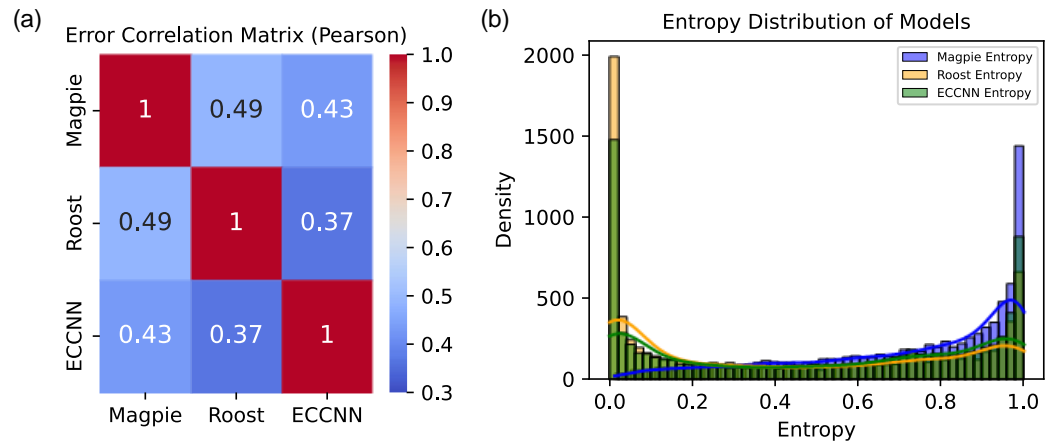

**Supplementary Fig. 3** Complementarity of different base-level models. **(a)** Error correlation matrix of three base-level models. **(b)** Entropy Distribution of three base-level models.

## Supplementary Tables

**Supplementary Table 1** The performance comparison of our proposed ECSG and other models trained on MP. The best results are shown in bold, while the second results are underlined.

| No. | Model                | ACC          | Precision    | Recall       | F1           | NPV          | AUC          | AUPR         |
|-----|----------------------|--------------|--------------|--------------|--------------|--------------|--------------|--------------|
| 1   | ECSG                 | <b>0.807</b> | <b>0.778</b> | <b>0.728</b> | <b>0.752</b> | <b>0.824</b> | <b>0.886</b> | <b>0.834</b> |
| 2   | Roost <sup>4</sup>   | <u>0.741</u> | <u>0.712</u> | <u>0.603</u> | <u>0.652</u> | <u>0.758</u> | <u>0.820</u> | <u>0.740</u> |
| 3   | CrabNet <sup>5</sup> | <u>0.755</u> | <u>0.646</u> | <u>0.838</u> | <u>0.729</u> | <u>0.869</u> | <u>0.852</u> | <u>0.781</u> |
| 4   | RF                   | <u>0.785</u> | <u>0.752</u> | <u>0.696</u> | <u>0.723</u> | <u>0.805</u> | <u>0.862</u> | <u>0.803</u> |
| 5   | Adaboost             | <u>0.689</u> | <u>0.637</u> | <u>0.531</u> | <u>0.579</u> | <u>0.716</u> | <u>0.747</u> | <u>0.649</u> |
| 6   | Magpie <sup>6</sup>  | <u>0.702</u> | <u>0.662</u> | <u>0.532</u> | <u>0.590</u> | <u>0.721</u> | <u>0.766</u> | <u>0.670</u> |
| 7   | Meredig <sup>7</sup> | <u>0.695</u> | <u>0.652</u> | <u>0.522</u> | <u>0.579</u> | <u>0.716</u> | <u>0.758</u> | <u>0.649</u> |
| 8   | ElemNet <sup>8</sup> | <u>0.726</u> | <u>0.653</u> | <u>0.684</u> | <u>0.667</u> | <u>0.780</u> | <u>0.719</u> | <u>0.732</u> |
| 9   | ATCNN <sup>9</sup>   | <u>0.72</u>  | <u>0.658</u> | <u>0.637</u> | <u>0.647</u> | <u>0.760</u> | <u>0.707</u> | <u>0.720</u> |
| 10  | ECCNN                | <u>0.766</u> | <u>0.727</u> | <u>0.669</u> | <u>0.697</u> | <u>0.788</u> | <u>0.842</u> | <u>0.770</u> |

**Supplementary Table 2** The performance comparison of classifiers with  $\Delta H_d$  threshold = 25 meV/atom on MP.

| No. | Model    | ACC          | Precision    | Recall       | F1           | NPV          | AUC          | AUPR         |
|-----|----------|--------------|--------------|--------------|--------------|--------------|--------------|--------------|
| 1   | ECSG     | <b>0.837</b> | <b>0.843</b> | <b>0.889</b> | <b>0.865</b> | <b>0.827</b> | <b>0.908</b> | <b>0.921</b> |
| 2   | Roost    | <u>0.711</u> | <u>0.595</u> | <u>0.875</u> | <u>0.708</u> | <u>0.878</u> | <u>0.813</u> | <u>0.852</u> |
| 3   | CrabNet  | <u>0.816</u> | <u>0.789</u> | <u>0.935</u> | <u>0.856</u> | <u>0.878</u> | <u>0.892</u> | <u>0.903</u> |
| 4   | RF       | <u>0.819</u> | <u>0.825</u> | <u>0.877</u> | <u>0.850</u> | <u>0.808</u> | <u>0.891</u> | <u>0.912</u> |
| 5   | Adaboost | <u>0.714</u> | <u>0.727</u> | <u>0.821</u> | <u>0.771</u> | <u>0.687</u> | <u>0.772</u> | <u>0.814</u> |
| 6   | Magpie   | <u>0.795</u> | <u>0.802</u> | <u>0.865</u> | <u>0.832</u> | <u>0.782</u> | <u>0.866</u> | <u>0.891</u> |
| 7   | Meredig  | <u>0.787</u> | <u>0.791</u> | <u>0.868</u> | <u>0.828</u> | <u>0.780</u> | <u>0.857</u> | <u>0.880</u> |
| 8   | ElemNet  | <u>0.782</u> | <u>0.799</u> | <u>0.841</u> | <u>0.820</u> | <u>0.754</u> | <u>0.842</u> | <u>0.865</u> |
| 9   | ATCNN    | <u>0.785</u> | <u>0.803</u> | <u>0.843</u> | <u>0.822</u> | <u>0.757</u> | <u>0.850</u> | <u>0.875</u> |
| 10  | ECCNN    | <u>0.763</u> | <u>0.785</u> | <u>0.821</u> | <u>0.803</u> | <u>0.726</u> | <u>0.830</u> | <u>0.862</u> |

**Supplementary Table 3** The performance comparison of classifiers with  $\Delta H_d$  threshold = 40 meV/atom on MP.

| No. | Model    | ACC          | Precision    | Recall       | F1           | NPV          | AUC          | AUPR         |
|-----|----------|--------------|--------------|--------------|--------------|--------------|--------------|--------------|
| 1   | ECSG     | <b>0.848</b> | <b>0.857</b> | <b>0.919</b> | <b>0.887</b> | <b>0.827</b> | <b>0.911</b> | <b>0.953</b> |
| 2   | Roost    | <u>0.668</u> | <u>0.552</u> | <u>0.914</u> | <u>0.688</u> | <u>0.898</u> | <u>0.794</u> | <u>0.837</u> |
| 3   | CrabNet  | <u>0.830</u> | <u>0.819</u> | <u>0.948</u> | <u>0.879</u> | <u>0.864</u> | <u>0.897</u> | <u>0.929</u> |
| 4   | RF       | <u>0.830</u> | <u>0.841</u> | <u>0.909</u> | <u>0.874</u> | <u>0.803</u> | <u>0.894</u> | <u>0.933</u> |
| 5   | Adaboost | <u>0.731</u> | <u>0.750</u> | <u>0.877</u> | <u>0.809</u> | <u>0.671</u> | <u>0.772</u> | <u>0.851</u> |
| 6   | Magpie   | <u>0.809</u> | <u>0.820</u> | <u>0.905</u> | <u>0.860</u> | <u>0.782</u> | <u>0.869</u> | <u>0.893</u> |
| 7   | Meredig  | <u>0.800</u> | <u>0.808</u> | <u>0.907</u> | <u>0.855</u> | <u>0.778</u> | <u>0.858</u> | <u>0.876</u> |
| 8   | ElemNet  | <u>0.801</u> | <u>0.823</u> | <u>0.882</u> | <u>0.852</u> | <u>0.749</u> | <u>0.846</u> | <u>0.863</u> |
| 9   | ATCNN    | <u>0.798</u> | <u>0.822</u> | <u>0.880</u> | <u>0.850</u> | <u>0.745</u> | <u>0.851</u> | <u>0.874</u> |
| 10  | ECCNN    | <u>0.768</u> | <u>0.801</u> | <u>0.855</u> | <u>0.827</u> | <u>0.694</u> | <u>0.823</u> | <u>0.852</u> |



**Supplementary Table 4** The performance comparison of regressors for  $\Delta H_d$  on MP.

| No. | Model    | MAE/eV per atom    |
|-----|----------|--------------------|
| 1   | ECSG     | <b>0.064±0.001</b> |
| 2   | Roost    | 0.067±0.006        |
| 3   | CrabNet  | 0.070±0.004        |
| 4   | RF       | 0.078±0.001        |
| 5   | Adaboost | 0.506±0.008        |
| 6   | Magpie   | 0.086±0.001        |
| 7   | Meredig  | 0.086±0.002        |
| 8   | ElemNet  | 0.073±0.009        |
| 9   | ATCNN    | 0.071±0.005        |
| 10  | ECCNN    | 0.086±0.001        |

Note: The best results are shown in bold, while the second results are underlined.

**Supplementary Table 5** The performance comparison of our proposed ECSG and other models trained on OQMD.

| No. | Model    | ACC   | Precision | Recall | F1    | NPV   | AUC   | AUPRC |
|-----|----------|-------|-----------|--------|-------|-------|-------|-------|
| 1   | ECSG     | 0.940 | 0.806     | 0.601  | 0.688 | 0.952 | 0.967 | 0.804 |
| 2   | Roost    | 0.928 | 0.722     | 0.614  | 0.640 | 0.954 | 0.958 | 0.756 |
| 3   | CrabNet  | 0.914 | 0.643     | 0.499  | 0.558 | 0.940 | 0.929 | 0.637 |
| 4   | RF       | 0.927 | 0.766     | 0.485  | 0.594 | 0.939 | 0.948 | 0.721 |
| 5   | Adaboost | 0.890 | 0.490     | 0.059  | 0.106 | 0.895 | 0.808 | 0.313 |
| 6   | Magpie   | 0.912 | 0.708     | 0.331  | 0.451 | 0.923 | 0.923 | 0.604 |
| 7   | Meredig  | 0.905 | 0.721     | 0.223  | 0.341 | 0.912 | 0.904 | 0.552 |
| 8   | ElemNet  | 0.907 | 0.618     | 0.424  | 0.499 | 0.932 | 0.923 | 0.584 |
| 9   | ATCNN    | 0.904 | 0.616     | 0.349  | 0.441 | 0.924 | 0.908 | 0.543 |
| 10  | ECCNN    | 0.902 | 0.604     | 0.328  | 0.423 | 0.922 | 0.895 | 0.520 |

Note: The best results are shown in bold, while the second results are underlined.

**Supplementary Table 6** The performance comparison of our proposed ECSG and other models trained on JARVIS.

| No. | Model    | ACC   | Precision | Recall | F1    | NPV   | AUC   | AUPRC |
|-----|----------|-------|-----------|--------|-------|-------|-------|-------|
| 1   | ECSG     | 0.970 | 0.825     | 0.813  | 0.819 | 0.983 | 0.988 | 0.914 |
| 2   | Roost    | 0.957 | 0.730     | 0.797  | 0.757 | 0.981 | 0.984 | 0.853 |
| 3   | CrabNet  | 0.954 | 0.708     | 0.768  | 0.735 | 0.979 | 0.981 | 0.824 |
| 4   | RF       | 0.954 | 0.767     | 0.645  | 0.701 | 0.968 | 0.973 | 0.767 |
| 5   | Adaboost | 0.940 | 0.680     | 0.543  | 0.604 | 0.959 | 0.967 | 0.704 |
| 6   | Magpie   | 0.939 | 0.675     | 0.527  | 0.592 | 0.957 | 0.966 | 0.700 |
| 7   | Meredig  | 0.950 | 0.746     | 0.606  | 0.669 | 0.964 | 0.979 | 0.798 |
| 8   | ElemNet  | 0.944 | 0.636     | 0.806  | 0.705 | 0.982 | 0.972 | 0.629 |
| 9   | ATCNN    | 0.945 | 0.673     | 0.681  | 0.675 | 0.971 | 0.973 | 0.748 |
| 10  | ECCNN    | 0.944 | 0.719     | 0.553  | 0.624 | 0.960 | 0.969 | 0.721 |

**Supplementary Table 7** The performance of integrating the three base models using different combination methods.

| Methods   | ACC   | Precision | Recall | F1    | NPV   | AUC   | AUPR  |
|-----------|-------|-----------|--------|-------|-------|-------|-------|
| SG        | 0.807 | 0.778     | 0.728  | 0.752 | 0.824 | 0.886 | 0.834 |
| Averaging | 0.788 | 0.772     | 0.673  | 0.719 | 0.797 | 0.865 | 0.804 |
| Voting    | 0.763 | 0.726     | 0.663  | 0.693 | 0.785 | 0.747 | 0.762 |

**Supplementary Table 8** Performance of ECSG after integrating CGCNN on the MP-structure database. ECSG+C represents the model after integrating CGCNN into ECSG, and ACC\_M represents the accuracy of correctly distinguishing polymorphs.

|        | Accuracy | Precision | Recall | F1    | NPV   | AUC   | AUPR  | ACC_M |
|--------|----------|-----------|--------|-------|-------|-------|-------|-------|
| ECSG   | 0.826    | 0.719     | 0.557  | 0.628 | 0.853 | 0.879 | 0.721 | 0     |
| CGCNN  | 0.835    | 0.738     | 0.578  | 0.648 | 0.860 | 0.899 | 0.746 | 0.193 |
| ECSG+C | 0.844    | 0.753     | 0.607  | 0.672 | 0.869 | 0.905 | 0.769 | 0.121 |

**Supplementary Table 9** The performance comparison in predicting perovskite halides in unknown space.

| No. | Model    | ACC   | F1    | AUC   | AUPRC |
|-----|----------|-------|-------|-------|-------|
| 1   | ECSG     | 0.790 | 0.373 | 0.758 | 0.474 |
| 2   | Roost    | 0.654 | 0.408 | 0.730 | 0.375 |
| 3   | CrabNet  | 0.488 | 0.307 | 0.513 | 0.234 |
| 4   | RF       | 0.750 | 0.285 | 0.702 | 0.390 |
| 5   | AdaBoost | 0.571 | 0.352 | 0.593 | 0.337 |
| 6   | Magpie   | 0.788 | 0.326 | 0.708 | 0.429 |
| 7   | Meredig  | 0.752 | 0.248 | 0.733 | 0.371 |
| 8   | ElemNet  | 0.718 | 0.337 | 0.701 | 0.353 |
| 9   | ATCNN    | 0.675 | 0.404 | 0.691 | 0.345 |
| 10  | ECCNN    | 0.337 | 0.327 | 0.451 | 0.207 |

**Supplementary Table 10** The performance comparison in predicting Li-containing oxides in unknown space.

| No. | Model    | ACC   | F1    | AUC   | AUPRC |
|-----|----------|-------|-------|-------|-------|
| 1   | ECSG     | 0.891 | 0.495 | 0.848 | 0.510 |
| 2   | Roost    | 0.813 | 0.408 | 0.802 | 0.417 |
| 3   | CrabNet  | 0.778 | 0.403 | 0.779 | 0.407 |
| 4   | RF       | 0.886 | 0.457 | 0.792 | 0.450 |
| 5   | AdaBoost | 0.877 | 0.239 | 0.754 | 0.340 |
| 6   | Magpie   | 0.880 | 0.449 | 0.799 | 0.438 |
| 7   | Meredig  | 0.880 | 0.302 | 0.789 | 0.385 |
| 8   | ElemNet  | 0.802 | 0.219 | 0.736 | 0.385 |
| 9   | ATCNN    | 0.863 | 0.315 | 0.741 | 0.346 |
| 10  | ECCNN    | 0.880 | 0.063 | 0.749 | 0.314 |

**Supplementary Table 11** The performance comparison in predicting transition metal oxides in unknown space.

| No. | Model    | ACC   | F1    | AUC   | AUPRC |
|-----|----------|-------|-------|-------|-------|
| 1   | ECSG     | 0.843 | 0.202 | 0.819 | 0.507 |
| 2   | Roost    | 0.841 | 0.219 | 0.799 | 0.464 |
| 3   | CrabNet  | 0.836 | 0.294 | 0.792 | 0.440 |
| 4   | RF       | 0.833 | 0.150 | 0.779 | 0.427 |
| 5   | AdaBoost | 0.828 | 0.058 | 0.736 | 0.358 |
| 6   | Magpie   | 0.841 | 0.224 | 0.792 | 0.459 |
| 7   | Meredig  | 0.843 | 0.304 | 0.808 | 0.470 |
| 8   | ElemNet  | 0.830 | 0.006 | 0.522 | 0.474 |
| 9   | ATCNN    | 0.830 | 0.238 | 0.753 | 0.390 |
| 10  | ECCNN    | 0.831 | 0.013 | 0.741 | 0.358 |

**Supplementary Table 12** The performance of ECSG and comparison models testing in the 2DMatpeida.

| No. | Model    | ACC   | Precision | Recall | F1    | NPV   | AUC   | AUPR  |
|-----|----------|-------|-----------|--------|-------|-------|-------|-------|
| 1   | ECSG     | 0.737 | 0.763     | 0.775  | 0.769 | 0.701 | 0.790 | 0.786 |
| 2   | Roost    | 0.687 | 0.730     | 0.714  | 0.718 | 0.644 | 0.752 | 0.769 |
| 3   | CrabNet  | 0.691 | 0.671     | 0.892  | 0.766 | 0.755 | 0.752 | 0.768 |
| 4   | RF       | 0.711 | 0.760     | 0.714  | 0.737 | 0.655 | 0.778 | 0.807 |
| 5   | Adaboost | 0.703 | 0.730     | 0.755  | 0.742 | 0.666 | 0.759 | 0.760 |
| 6   | Magpie   | 0.706 | 0.750     | 0.721  | 0.735 | 0.654 | 0.777 | 0.790 |
| 7   | Meredig  | 0.705 | 0.735     | 0.748  | 0.741 | 0.665 | 0.763 | 0.770 |
| 8   | ElemNet  | 0.649 | 0.716     | 0.639  | 0.664 | 0.604 | 0.719 | 0.718 |
| 9   | ATCNN    | 0.664 | 0.724     | 0.655  | 0.686 | 0.604 | 0.733 | 0.744 |
| 10  | ECCNN    | 0.606 | 0.678     | 0.578  | 0.623 | 0.540 | 0.649 | 0.696 |

**Supplementary Table 13** VASP calculation results for stable perovskite oxides recommended by ECSG. The unit of total energy is eV per unit cell, and the unit of formation energy is eV per atom.

| No. | Compounds                          | Total energy | Formation energy | Stability on MP | Stability on OQMD | Stability on JARVIS |
|-----|------------------------------------|--------------|------------------|-----------------|-------------------|---------------------|
| 1   | Na <sub>2</sub> WNiO <sub>6</sub>  | -65.853      | -2.299           | TRUE            | TRUE              | TRUE                |
| 2   | Na <sub>2</sub> MnTbO <sub>6</sub> | -62.898      | -2.498           | TRUE            | TRUE              | TRUE                |
| 3   | Ba <sub>2</sub> SmWO <sub>6</sub>  | -79.120      | -3.611           | TRUE            | TRUE              | TRUE                |
| 4   | YbPrMnNiO <sub>6</sub>             | -72.760      | -3.000           | TRUE            | TRUE              | TRUE                |
| 5   | PrGdV <sub>2</sub> O <sub>6</sub>  | -84.592      | -2.607           | FALSE           | FALSE             | FALSE               |
| 6   | TmInMn <sub>2</sub> O <sub>6</sub> | -73.733      | -2.668           | TRUE            | TRUE              | TRUE                |
| 7   | LuPmCo <sub>2</sub> O <sub>6</sub> | -73.406      | -2.842           | TRUE            | TRUE              | TRUE                |
| 8   | LaGdNi <sub>2</sub> O <sub>6</sub> | -71.186      | -1.912           | FALSE           | FALSE             | TRUE                |
| 9   | YPdWCrO <sub>6</sub>               | -82.612      | -2.686           | TRUE            | TRUE              | TRUE                |
| 10  | YBaNbCoO <sub>6</sub>              | -79.564      | -3.247           | TRUE            | TRUE              | TRUE                |
| 11  | CuNdVCoO <sub>6</sub>              | -71.906      | -2.535           | TRUE            | TRUE              | TRUE                |
| 12  | NaGeFeCoO <sub>6</sub>             | -59.822      | -1.682           | FALSE           | TRUE              | TRUE                |
| 13  | NaMnWAlO <sub>6</sub>              | -77.405      | -2.873           | TRUE            | TRUE              | TRUE                |
| 14  | ZrLiWVO <sub>6</sub>               | -82.252      | -2.826           | TRUE            | TRUE              | TRUE                |
| 15  | HoMgMnMoO <sub>6</sub>             | -75.066      | -2.738           | FALSE           | FALSE             | TRUE                |
| 16  | DyRbYMoO <sub>6</sub>              | -77.132      | -3.273           | TRUE            | TRUE              | TRUE                |
| 17  | KScWSrO <sub>6</sub>               | -72.552      | -2.896           | FALSE           | FALSE             | FALSE               |
| 18  | HoPrMnCoO <sub>6</sub>             | -78.255      | -3.112           | TRUE            | TRUE              | TRUE                |
| 19  | HoMnMgMoO <sub>6</sub>             | -75.956      | -2.827           | TRUE            | TRUE              | TRUE                |
| 20  | HoYbCrTiO <sub>6</sub>             | -82.337      | -3.717           | TRUE            | TRUE              | TRUE                |
| 21  | LiDyYbMoO <sub>6</sub>             | -71.594      | -3.119           | TRUE            | TRUE              | TRUE                |
| 22  | LiYbMoDyO <sub>6</sub>             | -73.111      | -3.271           | TRUE            | TRUE              | TRUE                |
| 23  | YRbMoDyO <sub>6</sub>              | -77.251      | -3.285           | TRUE            | TRUE              | TRUE                |
| 24  | CrGdWNbO <sub>6</sub>              | -86.851      | -2.770           | FALSE           | FALSE             | TRUE                |
| 25  | NaTlFeMnO <sub>6</sub>             | -60.931      | -1.813           | TRUE            | TRUE              | TRUE                |
| 26  | WGdCrNbO <sub>6</sub>              | -82.945      | -1.466           | FALSE           | FALSE             | FALSE               |
| 27  | SrKWScO <sub>6</sub>               | -79.139      | -3.555           | TRUE            | TRUE              | TRUE                |
| 28  | SrYbFeBiO <sub>6</sub>             | -63.481      | -2.640           | TRUE            | TRUE              | TRUE                |
| 29  | LuAgFeMnO <sub>6</sub>             | -70.250      | -2.377           | TRUE            | TRUE              | TRUE                |
| 30  | KScMnTiO <sub>6</sub>              | -77.666      | -2.872           | FALSE           | TRUE              | TRUE                |
| 31  | KGdCuVO <sub>6</sub>               | -67.731      | -1.786           | FALSE           | FALSE             | TRUE                |
| 32  | KGdWMgO <sub>6</sub>               | -75.396      | -2.415           | FALSE           | FALSE             | TRUE                |
| 33  | MoSrWCrO <sub>6</sub>              | -81.562      | -2.491           | TRUE            | FALSE             | TRUE                |
| 34  | NdCsCrZnO <sub>6</sub>             | -64.256      | -2.618           | TRUE            | TRUE              | TRUE                |
| 35  | ScCaMnVO <sub>6</sub>              | -80.052      | -3.198           | TRUE            | TRUE              | TRUE                |

**Supplementary Table 14** VASP calculation results for stable perovskite oxides recommended by Tala.<sup>10</sup>. The unit of total energy is eV per unit cell, and the unit of formation energy is eV per atom.

| No. | Compounds  | Total energy | Formation energy | Stability on MP | Stability on OQMD | Stability on JARVIS |
|-----|------------|--------------|------------------|-----------------|-------------------|---------------------|
| 1   | TeRbReSrO6 | -62.108      | -1.959           | FALSE           | FALSE             | TRUE                |
| 2   | NdTaReSrO6 | -77.074      | -2.206           | FALSE           | FALSE             | FALSE               |
| 3   | FeAuReSrO6 | -63.617      | -1.574           | FALSE           | FALSE             | FALSE               |
| 4   | PbIrReSrO6 | -65.133      | -1.419           | FALSE           | FALSE             | FALSE               |
| 5   | NbLaReSrO6 | -74.556      | -2.113           | FALSE           | FALSE             | FALSE               |
| 6   | NbLaBaReO6 | -72.698      | -1.904           | FALSE           | FALSE             | FALSE               |
| 7   | NdNbReCdO6 | -73.250      | -2.077           | FALSE           | FALSE             | FALSE               |
| 8   | PrTaMgReO6 | -78.822      | -2.388           | FALSE           | FALSE             | FALSE               |
| 9   | TcAuReSrO6 | -64.868      | -1.284           | FALSE           | FALSE             | FALSE               |
| 10  | PrNbMgReO6 | -78.459      | -2.528           | FALSE           | FALSE             | FALSE               |
| 11  | MoSmReSrO6 | -73.192      | -2.244           | FALSE           | FALSE             | FALSE               |
| 12  | NaTeReSrO6 | -61.902      | -1.905           | FALSE           | FALSE             | FALSE               |
| 13  | WNdReSrO6  | -76.940      | -2.526           | FALSE           | FALSE             | FALSE               |
| 14  | WPdReSrO6  | -67.101      | -1.501           | FALSE           | FALSE             | FALSE               |
| 15  | HfNdMgReO6 | -81.463      | -2.844           | FALSE           | FALSE             | FALSE               |
| 16  | ZrNdReSrO6 | -77.656      | -2.595           | FALSE           | FALSE             | FALSE               |
| 17  | CrNdReSrO6 | -77.741      | -2.693           | TRUE            | FALSE             | TRUE                |
| 18  | NbLaMgReO6 | -77.058      | -2.372           | FALSE           | FALSE             | FALSE               |
| 19  | BeAuReSrO6 | -58.267      | -1.286           | FALSE           | FALSE             | FALSE               |
| 20  | NiTiReSrO6 | -62.661      | -1.867           | FALSE           | FALSE             | TRUE                |
| 21  | NdNbReSrO6 | -76.274      | -2.301           | FALSE           | FALSE             | FALSE               |
| 22  | RhPrReCdO6 | -68.668      | -1.894           | FALSE           | FALSE             | TRUE                |
| 23  | TeFeReSrO6 | -64.136      | -1.639           | FALSE           | FALSE             | FALSE               |
| 24  | RuHgReSrO6 | -61.543      | -1.357           | FALSE           | FALSE             | FALSE               |
| 25  | PrNbReSrO6 | -75.041      | -2.177           | FALSE           | FALSE             | FALSE               |
| 26  | NdTaMnTiO6 | -85.703      | -2.943           | FALSE           | FALSE             | FALSE               |
| 27  | TaTiReSrO6 | -70.910      | -1.277           | FALSE           | FALSE             | FALSE               |
| 28  | CsNiReSrO6 | -62.788      | -2.026           | FALSE           | FALSE             | TRUE                |
| 29  | RhVReSrO6  | -67.798      | -1.468           | FALSE           | FALSE             | FALSE               |
| 30  | RhLaReSrO6 | -71.547      | -2.088           | FALSE           | FALSE             | FALSE               |
| 31  | RhPrReSrO6 | -72.595      | -2.208           | FALSE           | FALSE             | FALSE               |
| 32  | NbLaReCdO6 | -70.940      | -1.829           | FALSE           | FALSE             | FALSE               |
| 33  | TaLaMgReO6 | -77.546      | -2.245           | FALSE           | FALSE             | FALSE               |
| 34  | MoPmReSrO6 | -78.511      | -2.772           | TRUE            | TRUE              | TRUE                |
| 35  | CrPdReSrO6 | -67.525      | -1.630           | FALSE           | FALSE             | FALSE               |

**Supplementary Table 15** The Names and the number of data-points of databases in this study.

| Database                | Total number | Number of positive samples | Number of negative samples |
|-------------------------|--------------|----------------------------|----------------------------|
| MP                      | 85,014       | 33,998                     | 51,016                     |
| OQMD                    | 503,514      | 56,939                     | 446,575                    |
| JARVIS                  | 54,592       | 4,434                      | 50,158                     |
| Li-containing oxides    | 6,168        | 750                        | 5,418                      |
| Transition-metal oxides | 7,137        | 1,211                      | 5,926                      |
| Perovskite oxides       | 3,469        | 1,514                      | 1,955                      |
| MP-structure            | 125,45,      | 33,001                     | 92,450                     |
| C2DB                    | 13,408       | 7,441                      | 5,967                      |
| 2DMatpeida              | 4,743        | 2,682                      | 2061                       |

## References

1. Bartel CJ, Trewartha A, Wang Q, Dunn A, Jain A, Ceder G. A critical examination of compound stability predictions from machine-learned formation energies. *npj Comput Mater* **6**, 97 (2020).
2. Bartel CJ. Review of computational approaches to predict the thermodynamic stability of inorganic solids. *J Mater Sci* **57**, 10475-10498 (2022).
3. Fung V, Hu G, Ganesh P, Sumpter BG. Machine learned features from density of states for accurate adsorption energy prediction. *Nat Commun* **12**, 88 (2021).
4. Goodall REA, Lee AA. Predicting materials properties without crystal structure: deep representation learning from stoichiometry. *Nat Commun* **11**, 6280 (2020).
5. Wang AY-T, Kauwe SK, Murdock RJ, Sparks TD. Compositionally restricted attention-based network for materials property predictions. *npj Comput Mater* **7**, 77 (2021).
6. Kaikhura B, Gallagher B, Kim S, Hiszpanski A, Han TY-J. Reliable and explainable machine-learning methods for accelerated material discovery. *npj Comput Mater* **5**, 108 (2019).
7. Agrawal A, Meredig B, Wolverton C, Choudhary A. A Formation Energy Predictor for Crystalline Materials Using Ensemble Data Mining. In: *2016 IEEE 16th International Conference on Data Mining Workshops (ICDMW)* (2016).
8. Jha D, *et al.* ElemNet: Deep Learning the Chemistry of Materials From Only Elemental Composition. *Sci Rep* **8**, 17593 (2018).
9. Zeng S, Zhao Y, Li G, Wang R, Wang X, Ni J. Atom table convolutional neural networks for an accurate prediction of compounds properties. *npj Comput Mater* **5**, 84 (2019).
10. Talapatra A, Uberuaga BP, Stanek CR, Pilania G. A Machine Learning Approach for the Prediction of Formability and Thermodynamic Stability of Single and Double Perovskite Oxides. *Chem Mater* **33**, 845-858 (2021).
